# Supplementary material for: Facile synthesis of NiAl-layered double hydroxide/graphene hybrid with enhanced electrochemical properties for detection of dopamine
Source: Royal Society of Chemistry journal article supplement (doi:10.1039/c1nr10592b), 2011-01-01
Supplement: c1nr10592b.pdf [file c1nr10592b.pdf]

## Electronic Supplementary Information

### Facile synthesis of NiAl-layered double hydroxide/graphene hybrid with enhanced electrochemical properties for detection of dopamine

Meixia Li,<sup>a</sup> Jun E Zhu,<sup>a</sup> Lili Zhang,<sup>b</sup> Xu Chen,<sup>\*a</sup> Huimin Zhang,<sup>b</sup> Fazhi Zhang,<sup>a</sup> Sailong Xu<sup>\*a</sup> and David G. Evans<sup>a</sup>

<sup>a</sup> State Key Laboratory of Chemical Resource Engineering, Beijing University of Chemical Technology, Beijing 100029, China; Email: xusl@buct.cn (S. L); chenxu@mail.buct.edu.cn (X. Chen);

<sup>b</sup> Division of science, Beijing Institute of Technology, Beijing 100081, China.

**Figure S1**

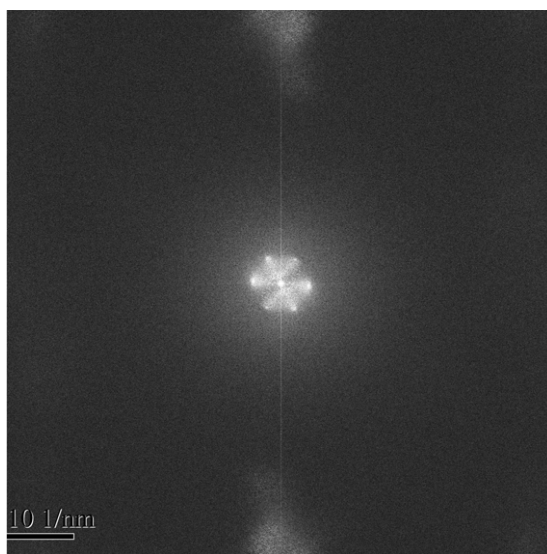

**Fig. S1** An image obtained by two-dimensional fast Fourier transform of the HRTEM image of Fig. 3b.

**Figure S2**

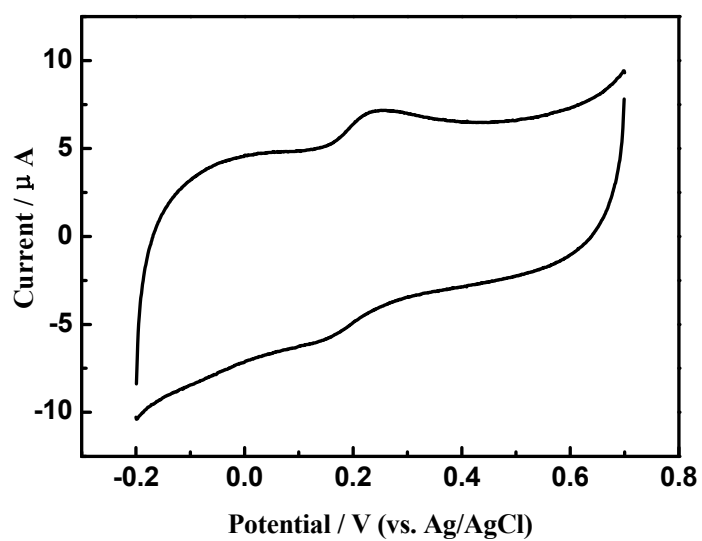

**Fig. S2** CV curve of the pristine G modified electrode in pH 7.0 PBS solution in the presence of 100  $\mu\text{M}$  DA at a scan rate of 0.1 V/s.
